# Supplementary material for: The Synergistic Activity and Optimizing Doses of Tigecycline in Combination with Aminoglycosides against Clinical Carbapenem-Resistant Klebsiella pneumoniae Isolates
Source: MDPI journal article supplement (doi:10.3390/antibiotics10060736), 2021-06-17
Supplement: s1 [file s1]

## Supplementary Materials

### Supplementary Material S1

**Table S1 A set of parameters of tigecycline [34]**

| PK parameters      | Estimate | % RSE |
|--------------------|----------|-------|
| CL (L/h)           | 22.1     | 3.16  |
| V <sub>c</sub> (L) | 162.0    | 5.3   |
| Q (L/h)            | 69.4     | 32.6  |
| V <sub>p</sub> (L) | 87.9     | 8.67  |

Abbreviations: CL, Clearance; V<sub>c</sub>, Central volume of distribution; Q, intercompartmental clearance; V<sub>p</sub>, Peripheral volume of distribution; RSE, Relative standard error

**Table S2 A set of parameters and an equation of amikacin [32]**

| PK parameters               | Estimates | % RSE |
|-----------------------------|-----------|-------|
| CL (L/h)                    | 0.77      | 28.4  |
| V <sub>c</sub> (L)          | 19.2      | 5.31  |
| Q (L/h)                     | 4.38      | 18.3  |
| V <sub>p</sub> (L)          | 9.38      | 7.15  |
| $\theta_{CL-CrCL}$ (ml/min) | 1.42      | 18.4  |

Abbreviations: CL, Clearance; V<sub>c</sub>, Central volume of distribution; Q, intercompartmental clearance; V<sub>p</sub>, Peripheral volume of distribution; RSE, Relative standard error;  $\theta_{CL-CrCL}$ , fractional change on CL resulting from CrCL; CrCL, creatinine clearance (estimated by the Cockcroft-Gault)

Covariate model:  $CL_{pop} = CL + CrCL^{\theta_{CL-CrCL}}$

**Table S3 A set of parameters and an equation of gentamicin [33]**

| PK parameters | Estimate | % CV |
|---------------|----------|------|
| CL (L/h)      | 3.14     | 83.7 |
| V(L)          | 53.0     | 64.4 |

Abbreviations: CL, Clearance;  $V_c$ , Central volume of distribution;  $Q$ , intercompartmental clearance;  $V_p$ , Peripheral volume of distribution; CV, Coefficient of variation;

Covariate model:  $CL = \frac{3.14 \times CrCL^{1.2}}{54.8^{1.2} + CrCL^{1.2}}$ ; CrCL, creatinine clearance (estimated by glomerular filtration rate (GFR):  $GFR (ml/min) = 186.3 \times Cr^{-1.154} \times Age^{-0.203} \times (1.212 \text{ if black}) \times (0.742 \text{ if female})$  where Cr is serum creatinine level (mg/dl)

**Table S4 Antibiotic dosing regimens**

| Antibiotics | CrCL (ml/min) | LD       | MD               |
|-------------|---------------|----------|------------------|
| Tigecycline | -             | 200 mg   | 100 mg q 12 h    |
|             |               | 200 mg   | 100 mg q 24 h    |
|             |               | 400 mg   | 100 mg q 12 h    |
|             |               | 400 mg   | 100 mg q 24 h    |
|             |               | 400 mg   | 200 mg q 12 h    |
|             |               | 400 mg   | 200 mg q 24 h    |
| Amikacin    | 0-9           | 15 mg/kg | 7.5 mg/kg q 48 h |
|             |               | 20 mg/kg | 7.5 mg/kg q 48 h |
|             |               | 25 mg/kg | 7.5 mg/kg q 48 h |
|             | 10-25         | 20 mg/kg | 10 mg/kg q 48 h  |
|             |               | 20 mg/kg | 15 mg/kg q 48 h  |
|             |               | 25 mg/kg | 10 mg/kg q 48 h  |
|             |               | 25 mg/kg | 15 mg/kg q 48 h  |
|             | 26-50         | 20 mg/kg | 12 mg/kg q 24 h  |
|             |               | 20 mg/kg | 15 mg/kg q 24 h  |
|             |               | 25 mg/kg | 12 mg/kg q 24 h  |
|             |               | 25 mg/kg | 15 mg/kg q 24 h  |
|             | 51-90         | 25 mg/kg | 15 mg/kg q 24 h  |
|             |               | 25 mg/kg | 20 mg/kg q 24 h  |
|             |               | 30 mg/kg | 15 mg/kg q 24 h  |
|             |               | 30 mg/kg | 20 mg/kg q 24 h  |
|             | 91-130        | 25 mg/kg | 15 mg/kg q 24 h  |
|             |               | 25 mg/kg | 20 mg/kg q 24 h  |
|             |               | 30 mg/kg | 15 mg/kg q 24 h  |
|             |               | 30 mg/kg | 20 mg/kg q 24 h  |

| Antibiotics | CrCL (ml/min) | LD      | MD               |
|-------------|---------------|---------|------------------|
| Gentamicin  | 0-9           | 3 mg/kg | 2.5 mg/kg q 48 h |
|             |               | 5 mg/kg | 2.5 mg/kg q 48 h |
|             |               | 7 mg/kg | 2.5 mg/kg q 48 h |
|             | 10-25         | 5 mg/kg | 4 mg/kg q 48 h   |
|             |               | 7 mg/kg | 3 mg/kg q 48 h   |
|             |               | 7 mg/kg | 5 mg/kg q 48 h   |
|             |               | 8 mg/kg | 3 mg/kg q 48 h   |
|             |               | 8 mg/kg | 5 mg/kg q 48 h   |
|             | 26-50         | 5 mg/kg | 3 mg/kg q 24 h   |
|             |               | 5 mg/kg | 4 mg/kg q 24 h   |
|             |               | 7 mg/kg | 3 mg/kg q 24 h   |
|             |               | 8 mg/kg | 7 mg/kg q 24 h   |
|             | 51-90         | 7 mg/kg | 5 mg/kg q 24 h   |
|             |               | 7 mg/kg | 6 mg/kg q 24 h   |
|             |               | 8 mg/kg | 5 mg/kg q 24 h   |
|             |               | 8 mg/kg | 6 mg/kg q 24 h   |
|             |               | 8 mg/kg | 7 mg/kg q 24 h   |
|             | 91-130        | 7 mg/kg | 5 mg/kg q 24 h   |
|             |               | 7 mg/kg | 6 mg/kg q 24 h   |
|             |               | 8 mg/kg | 5 mg/kg q 24 h   |
|             |               | 8 mg/kg | 6 mg/kg q 24 h   |
|             |               | 8 mg/kg | 7 mg/kg q 24 h   |

Abbreviations: CrCL, Creatinine clearance; LD, Loading dose; MD, Maintenance dose

## Supplementary Material S2

Table S5: Tigecycline MIC distribution (monotherapy)

| Tigecycline MIC (monotherapy) (µg/ml) | Frequency (n) | Percentage (%) |
|---------------------------------------|---------------|----------------|
| ≤ 0.03125                             | 0             | 0.00           |
| 0.0625                                | 0             | 0.00           |
| 0.125                                 | 0             | 0.00           |
| 0.25                                  | 0             | 0.00           |
| 0.5                                   | 10            | 20.41          |
| 1                                     | 18            | 36.73          |
| 2                                     | 18            | 36.73          |
| 4                                     | 1             | 2.04           |
| 8                                     | 1             | 2.04           |
| 16                                    | 1             | 2.04           |
| 32                                    | 0             | 0.00           |
| 64                                    | 0             | 0.00           |
| 128                                   | 0             | 0.00           |

Table S6: Amikacin MIC distribution (monotherapy)

| Amikacin MIC (monotherapy) (µg/ml) | Frequency (n) | Percentage (%) |
|------------------------------------|---------------|----------------|
| ≤ 0.0625                           | 0             | 0.00           |
| 0.125                              | 0             | 0.00           |
| 0.25                               | 1             | 2.04           |
| 0.5                                | 1             | 2.04           |
| 1                                  | 3             | 6.12           |
| 2                                  | 16            | 32.65          |
| 4                                  | 6             | 12.24          |
| 8                                  | 14            | 28.57          |
| 16                                 | 4             | 8.16           |
| 32                                 | 4             | 8.16           |
| 64                                 | 0             | 0.00           |
| 128                                | 0             | 0.00           |

Table S7: Amikacin MIC distribution (combination therapy)

| Amikacin MIC (combined with tigecycline) (µg/ml) | Frequency (n) | Percentage (%) |
|--------------------------------------------------|---------------|----------------|
| ≤ 0.0625                                         | 17            | 34.69          |
| 0.125                                            | 10            | 20.41          |
| 0.25                                             | 9             | 18.37          |
| 0.5                                              | 6             | 12.24          |
| 1                                                | 1             | 2.04           |
| 2                                                | 6             | 12.24          |
| 4                                                | 0             | 0.00           |
| 8                                                | 0             | 0.00           |
| 16                                               | 0             | 0.00           |
| 32                                               | 0             | 0.00           |
| 64                                               | 0             | 0.00           |

**Table S8: Gentamicin MIC distribution (monotherapy)**

| <b>Gentamicin MIC (monotherapy) (µg/ml)</b> | <b>Frequency (n)</b> | <b>Percentage (%)</b> |
|---------------------------------------------|----------------------|-----------------------|
| ≤ 0.03125                                   | 9                    | 18.37                 |
| 0.0625                                      | 2                    | 4.08                  |
| 0.125                                       | 11                   | 22.45                 |
| 0.25                                        | 8                    | 16.33                 |
| 0.5                                         | 4                    | 8.16                  |
| 1                                           | 0                    | 0.00                  |
| 2                                           | 8                    | 16.33                 |
| 4                                           | 2                    | 4.08                  |
| 8                                           | 3                    | 6.12                  |
| 16                                          | 1                    | 2.04                  |
| 32                                          | 0                    | 0.00                  |
| 64                                          | 1                    | 2.04                  |

**Table S9: Gentamicin MIC distribution (combination therapy)**

| <b>Gentamicin MIC (combined with tigecycline) (µg/ml)</b> | <b>Frequency (n)</b> | <b>Percentage (%)</b> |
|-----------------------------------------------------------|----------------------|-----------------------|
| ≤ 0.0078125                                               | 26                   | 53.06                 |
| 0.015625                                                  | 2                    | 4.08                  |
| 0.03125                                                   | 8                    | 16.33                 |
| 0.0625                                                    | 6                    | 12.24                 |
| 0.125                                                     | 7                    | 14.29                 |
| 0.25                                                      | 0                    | 0.00                  |
| 0.5                                                       | 0                    | 0.00                  |
| 1                                                         | 0                    | 0.00                  |
| 2                                                         | 0                    | 0.00                  |
| 4                                                         | 0                    | 0.00                  |
| 8                                                         | 0                    | 0.00                  |
